# Supplementary material for: Inhibition of the endosymbiont “Candidatus Midichloria mitochondrii” during 16S rRNA gene profiling reveals potential pathogens in Ixodes ticks from Australia
Source: PubMed Central journal article supplement (PMC4493822; doi:10.1186/s13071-015-0958-3), 2015-06-25

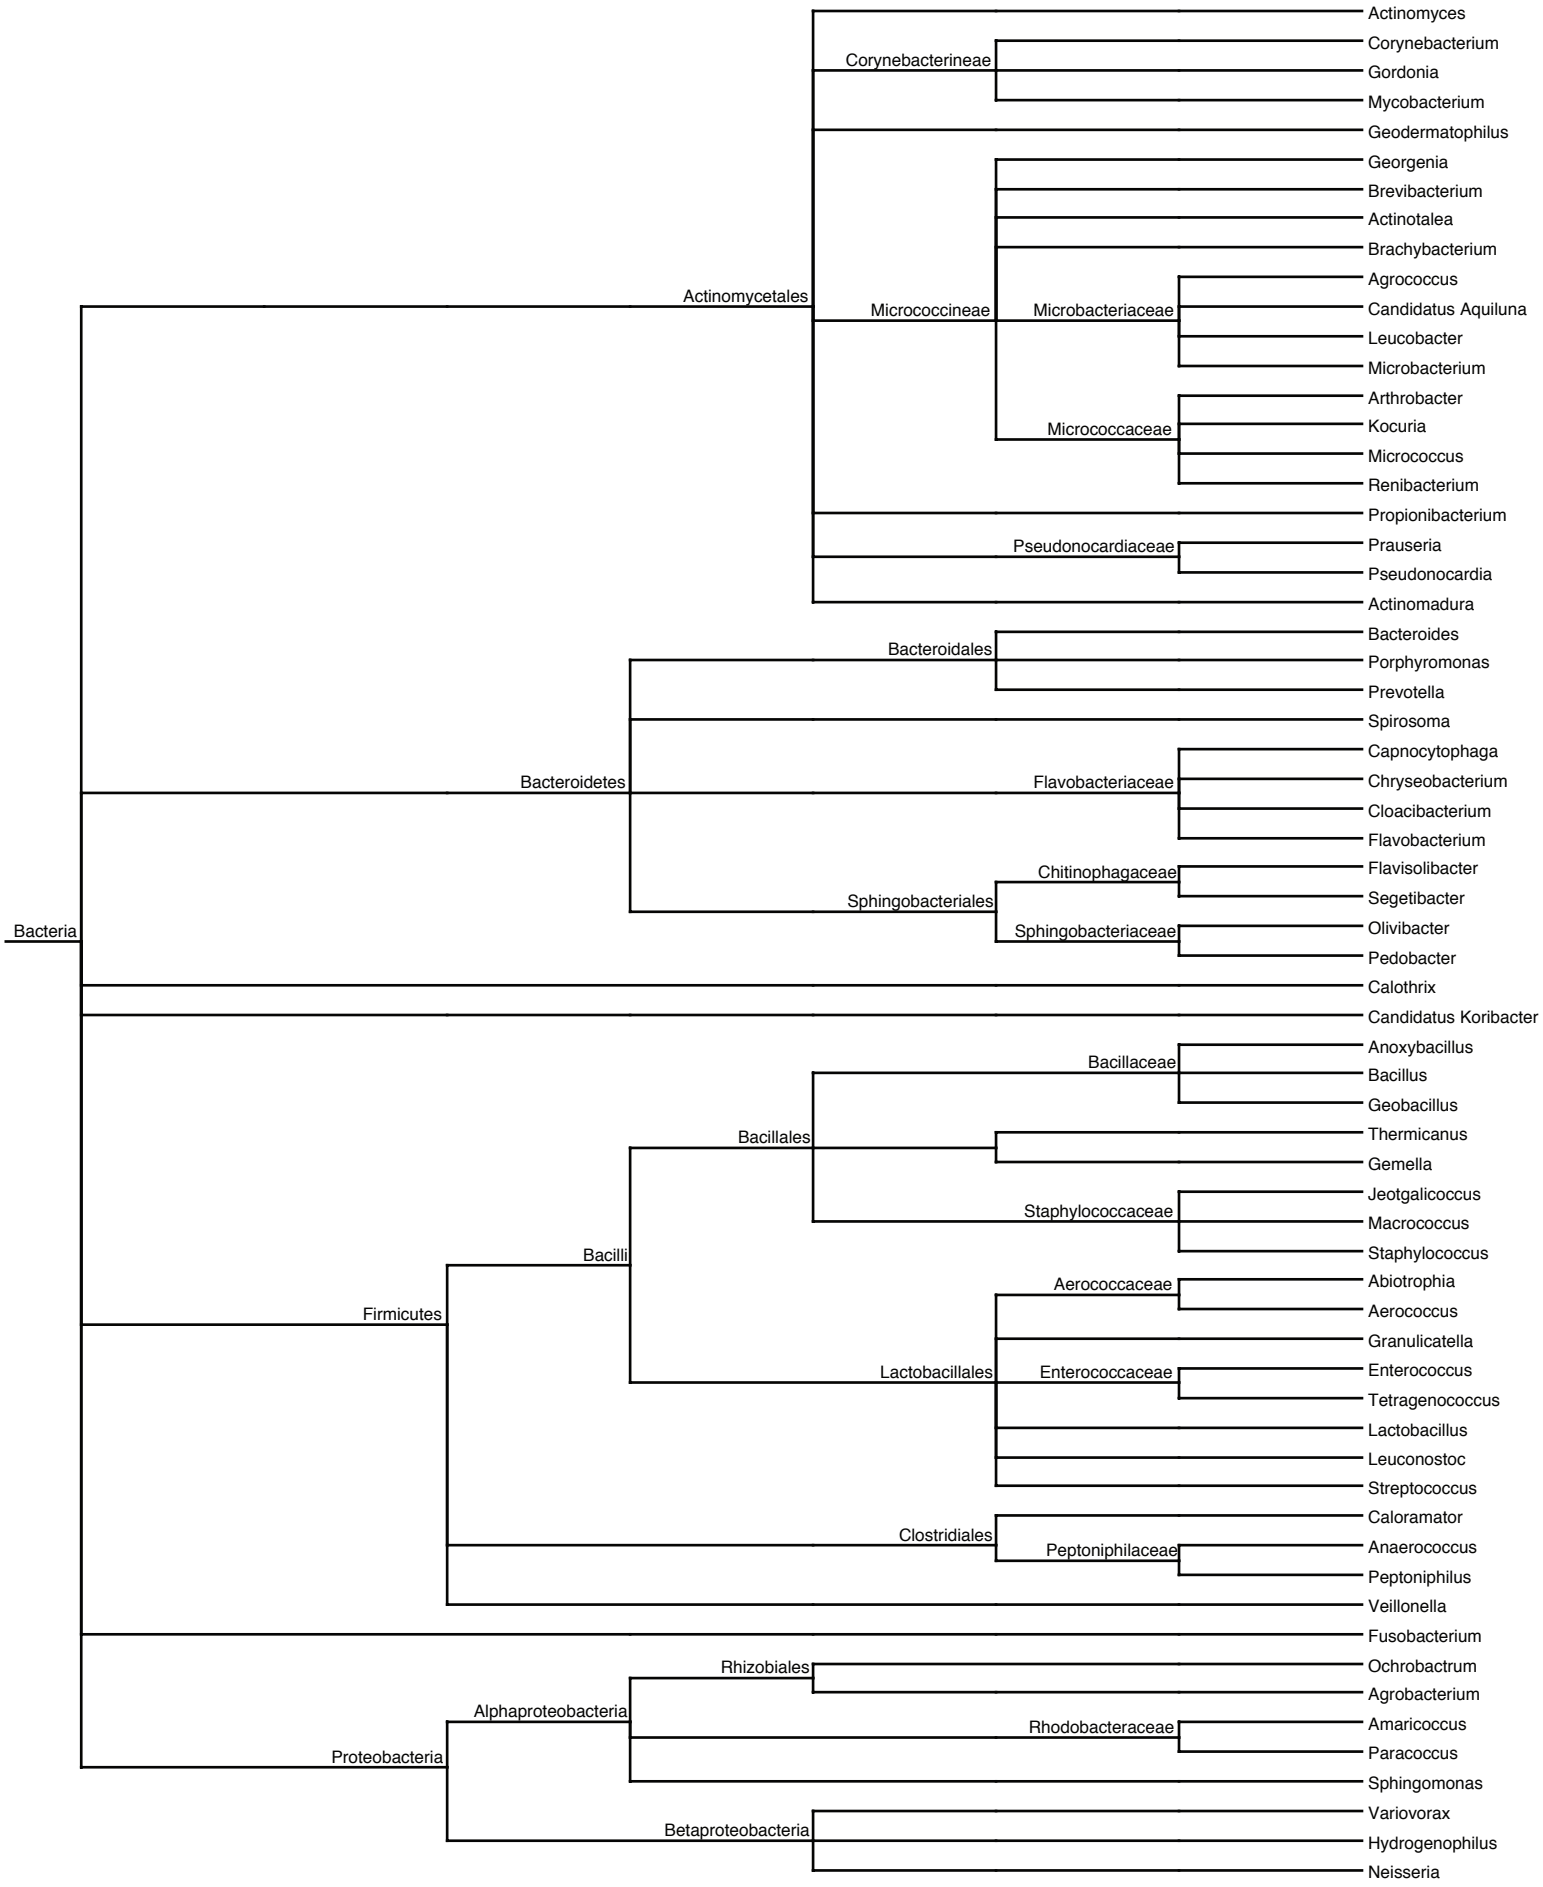

Supplement: 13071_2015_958_MOESM1_ESM.pdf [file 13071_2015_958_MOESM1_ESM.pdf]
